# Supplementary material
Source: publisher site journal article supplement (https://www.spandidos-publications.com/3451/downloadSupplementary)

Figure S1. Comparison of ESR levels among patients with locally advanced rectal cancer according to SHP expression. Data were analyzed using the Mann-Whitney U test. ESR, erythrocyte sedimentation rate; SHP, small heterodimer partner.

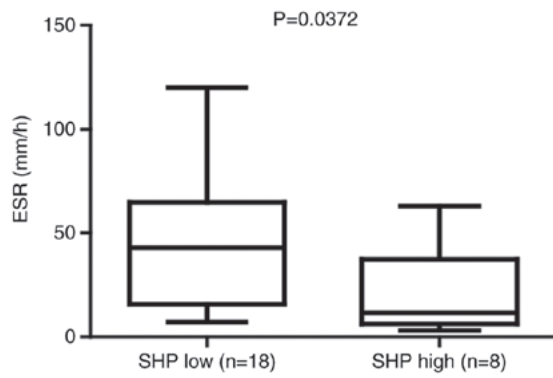

Figure S2. Relative expression of SHP in patients with or without a pCR to neoadjuvant radiochemotherapy. Data were normalized to GAPDH values. Data were analyzed using the Mann-Whitney U test. SHP, SHP, small heterodimer partner; pCR, pathological complete response.

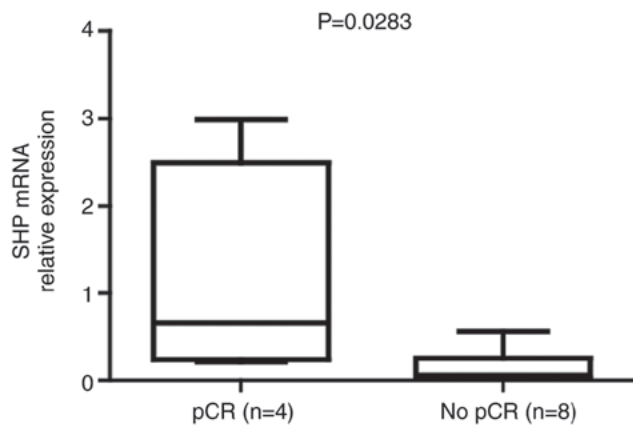

Figure S3. Changes in SHP expression after preoperative RCT in patients with locally advanced rectal cancer. Data were analyzed using the Mann-Whitney U test. SHP, SHP, small heterodimer partner; RCT, radiochemotherapy.

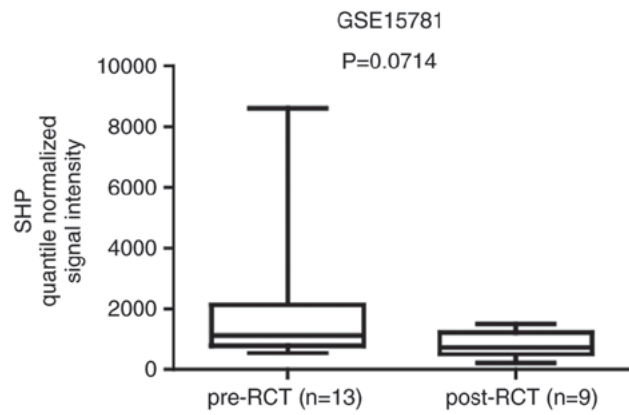

Supplement: Supplementary file 1 [file downloadSupplementary]
